# Supplementary material
Source: PubMed Central journal article supplement (PMC7520450)
Supplement: BPH-177-4645-s001.pdf [file BPH-177-4645-s001.pdf]

## **Supporting Information**

# **Small molecule-driven SIRT3-autophagy mediated NLRP3 inflammasome inhibition ameliorates inflammatory crosstalk between macrophages and adipocytes**

**Running title:** A cycloartane triterpenoid alleviates adipose tissue inflammation

Tian Zhang<sup>1,\*</sup>, Zhujun Fang<sup>3,\*</sup>, Ke-Gang Linghu<sup>1</sup>, Jingxin Liu<sup>1</sup>, Lishe Gan<sup>2,3</sup>, Ligen Lin<sup>1</sup>

<sup>1</sup> State Key Laboratory of Quality Research in Chinese Medicine, Institute of Chinese Medical Sciences, University of Macau, Avenida da Universidade, Taipa, Macau 999078, China

<sup>2</sup> School of Biotechnology and Health Sciences, Wuyi University, Jiangmen, Guangdong 529020, China

<sup>3</sup> College of Pharmaceutical Sciences, Zhejiang University, 866 Yuhangtang Road, Hangzhou 310018, China

\*Tian Zhang and Zhujun Fang contributed equally to this work.

## **Correspondence**

Dr. Lishe Gan: School of Biotechnology and Health Sciences, Wuyi University, Jiangmen, Guangdong 529020, China. email: ganlishe@163.com.

Dr. Ligen Lin: Institute of Chinese Medical Sciences, University of Macau, Avenida da Universidade, Taipa, Macau 999078, China. Tel.: +853 88228041; Fax: +853 28841358; email: ligenl@um.edu.mo.

**Table S1. Antibodies for Western blotting analysis.**

| Antibody                           | Source | Vendor                    | Catalog No. | RRID No.    |
|------------------------------------|--------|---------------------------|-------------|-------------|
| Beclin 1                           | Rabbit | Cell Signaling Technology | #3495       | AB_1903911  |
| LC3                                | Rabbit | Cell Signaling Technology | #12741      | AB_2617131  |
| <i>p</i> -AMPK $\alpha$ ( Thr172 ) | Rabbit | Cell Signaling Technology | #50081      | AB_2799368  |
| AMPK $\alpha$                      | Rabbit | Cell Signaling Technology | # 5831      | AB_10622186 |
| p62                                | Rabbit | Sigma-Aldrich             | P0067       | AB_1841064  |
| Atg5                               | Rabbit | Cell Signaling Technology | #12994      | AB_2630393  |
| Atg7                               | Rabbit | Cell Signaling Technology | #8558       | AB_10831194 |
| NLRP3                              | Rabbit | Cell Signaling Technology | #13158      | AB_2798134  |
| Caspase-1                          | Rabbit | Cell Signaling Technology | #3866       | AB_2069051  |
| ASC/TMS1                           | Rabbit | Cell Signaling Technology | # 13833     | AB_2798325  |
| IL-1 $\beta$                       | Rabbit | Cell Signaling Technology | # 31202     | AB_2799001  |
| Cleaved Caspase-1                  | Rabbit | Cell Signaling Technology | # 67314     | AB_2714037  |
| Cleaved-IL-1 $\beta$               | Rabbit | Cell Signaling Technology | # 83186     | AB_2800010  |
| ULK1                               | Rabbit | Cell Signaling Technology | #8054       | AB_11178668 |
| <i>p</i> -ULK1 (Ser555)            | Rabbit | Cell Signaling Technology | #5869       | AB_10707365 |
| SIRT3                              | Rabbit | Proteintech               | 10099-1-AP  | AB_2239240  |
| SOD2                               | Rabbit | Cell Signaling Technology | # 13141     | AB_2636921  |
| Acetylated-Lysine                  | Mouse  | Cell Signaling Technology | # 9681      | AB_331799   |
| Cytochrome C                       | Rabbit | Cell Signaling Technology | # 11940     | AB_2637071  |
| $\alpha$ -Tubulin                  | Mouse  | Cell Signaling Technology | # 12351     | AB_2797891  |
| GAPDH                              | Rabbit | Santa Cruz Biotechnology  | sc-25778    | AB_10167668 |
| Perilipin-1                        | Rabbit | Cell Signaling Technology | #9349S      | AB_10829911 |
| Integrin $\alpha$ X                | Mouse  | Santa Cruz Biotechnolog   | sc-46676    | AB_626859   |
| F4/80                              | Mouse  | Santa Cruz Biotechnolog   | sc-71085    | AB_1122717  |
| CD206/MRC1                         | Rabbit | Cell Signaling Technology | #91992      | AB_2800175  |
| CD68                               | Mouse  | Santa Cruz Biotechnolog   | Sc-20060    | AB_627158   |
| Anti-rabbit IgG                    |        | Cell Signaling Technology | #7074       | AB_2099233  |
| Anti-Mouse IgG                     |        | Cell Signaling Technology | #7076       | AB_330924   |

**Table S2. List of oligonucleotide primer pairs used in qRT-PCR.**

| Gene                            | Forward                  | Reverse                   |
|---------------------------------|--------------------------|---------------------------|
| <i>18S</i>                      | AGCCTGCGGCTTAATTTGAC     | CAACTAAGAACGGCCATGCA      |
| <i>Arginase-1</i>               | CTCCAAGCCAAAGTCCTTAGAG   | AGGAGCTGTCATTAGGGACATC    |
| <i>Ccl5</i>                     | TGCAGAGGACTCTGAGACAGC    | GAGTGGTGTCCGAGCCATA       |
| <i>CD11c</i>                    | CTGGATAGCCTTTCTTCTGCTG   | GCACACTGTGTCCGAACTC       |
| <i>CD206</i>                    | CAGGTGTGGGCTCAGGTAGT     | TGTGGTGAGCTGAAAGGTGA      |
| <i>CD68</i>                     | CCTTATGGACAGCTTACCTTTGG  | CTGAGCAGCCTGTAGCCTTAGAG   |
| <i>Cxcl10</i>                   | GCTGCCGTCATTTTCTGC       | TCTCACTGGCCCGTCATC        |
| <i>F4/80</i>                    | CTTTGGCTATGGGCTTCCAGTC   | GCAAGGAGGACAGAGTTTATCGTG  |
| <i>Ccl11</i>                    | AGAGCTCCACAGCGCTTCT      | GCAGGAAGTTGGGATGGA        |
| <i>Cxcl10</i>                   | GCTGCCGTCATTTTCTGC       | TCTCACTGGCCCGTCATC        |
| <i>MCP-1</i>                    | CAACTCTCACTGAAGCCAGCTC   | TAGCTCTCCAGCCTACTCATTGG   |
| <i>MIP-1<math>\alpha</math></i> | CTTCTCTGTACCATGACACTCTGC | ATTCAGTTCCAGGTCAGTGATGTAT |
| <i>IL-1<math>\beta</math></i>   | TGTTCTTTGAAGTTGACGGACCC  | TCATCTCGGAGCCTGTAGTGC     |

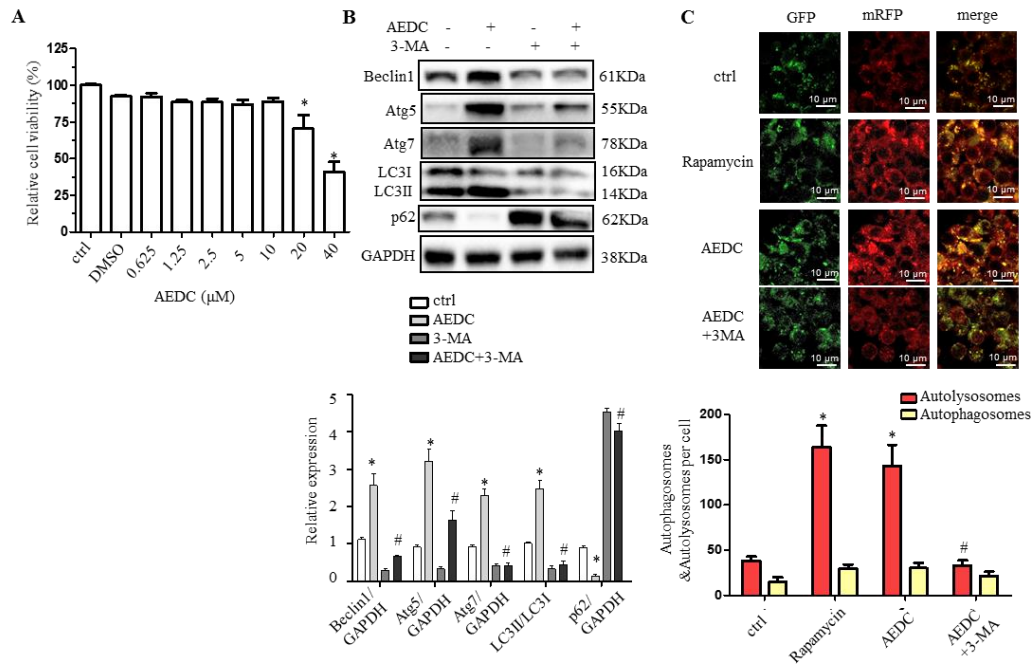

**Figure S1.** Cytotoxicity and autophagy inducing activity of AEDC on THP-1 cells. (A) THP-1 cells were treated with different concentrations of AEDC for 24 h. Cell viability was detected by MTT assay ( $n = 9$ ). (B) THP-1 cells were treated with or without AEDC (10  $\mu$ M) for 12 h and 3-MA (5 mM) for 6 h. Expression of autophagy related proteins was detected by Western blotting ( $n = 6$ ). GAPDH was used as an internal loading control. Data were normalized to the mean value of the control group. (E) THP-1 cells were transiently infected with the mRFP-GFP-LC3 lentivirus. mRFP-GFP-LC3 puncta were measured using a confocal microscope ( $n = 5$ ). Scale bar = 10  $\mu$ m. Data are expressed as means  $\pm$  SEM. \* $P < 0.05$  AEDC vs. ctrl; # $P < 0.05$  AEDC vs. AEDC + 3-MA.

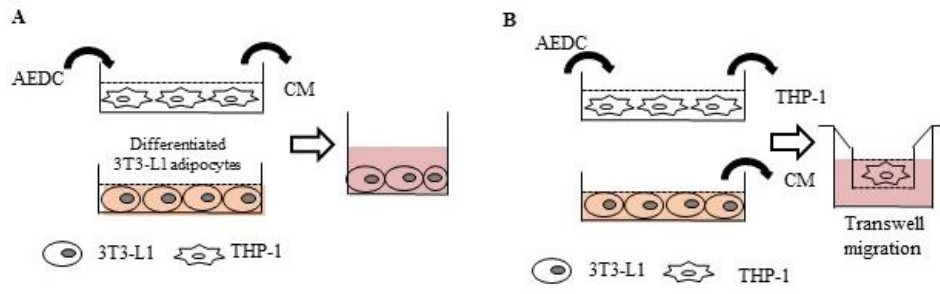

**Figure S2.** The experimental procedures of the macrophage-adipocyte co-culture experiments (A), and the procedures of the macrophage migration experiments (B).

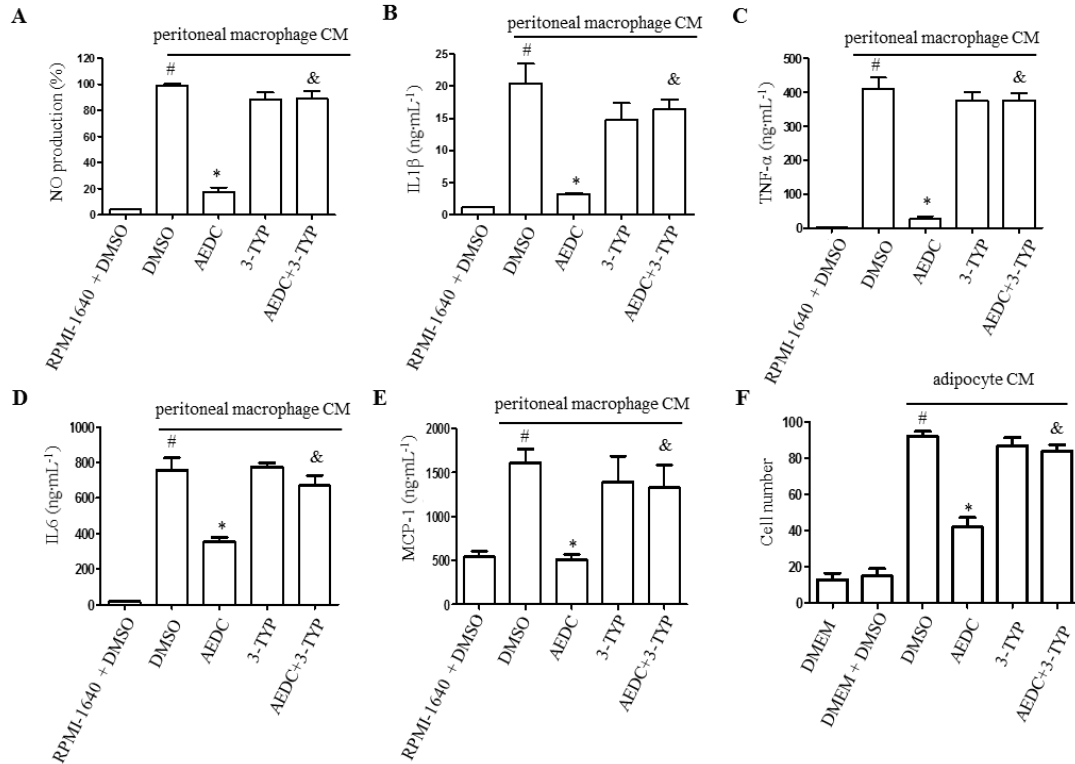

**Figure S3.** AEDC attenuates the primary peritoneal macrophages-CM induced inflammatory responses in adipocytes. THP-1 cells were treated with or without 10  $\mu$ M AEDC for 12 h and 50  $\mu$ M 3-TYP for 6 h. Subsequently, the cells were stimulated with LPS (1  $\mu$ g·mL<sup>-1</sup>) for 4 h and then 1 mM ATP for 1 h. Then, the cells were changed to fresh medium. After 24 h, the medium supernatants were collected as peritoneal macrophage CM. The fully differentiated 3T3-L1 adipocytes were incubated in peritoneal macrophage CM for 24 h. NO production (A) and the levels of IL- $\beta$  (B), TNF- $\alpha$  (C), IL-6 (D) and MCP-1 (E) in 3T3-L1 adipocytes were determined by ELISA kits. Data are expressed as means  $\pm$  SEM ( $n = 6$ ). # $P < 0.05$ , RPMI-1640 + DMSO vs. peritoneal macrophage CM + DMSO; \* $P < 0.05$ , peritoneal macrophage CM + AEDC vs. peritoneal macrophage CM + DMSO; & $P < 0.05$ , peritoneal macrophage CM + AEDC vs. peritoneal macrophage CM + AEDC + 3-TYP. (F) The primary peritoneal macrophages were treated with or without 10  $\mu$ M AEDC for 12 h and 50  $\mu$ M 3-TYP for 6 h, followed by co-culture with adipocyte CM for 4 h. Migrated primary peritoneal macrophages were visualized by DAPI staining and quantified. Data are expressed as means  $\pm$  SEM ( $n = 6$ ). # $P < 0.05$ , DMEM + DMSO vs. adipocyte CM + DMSO; \* $P < 0.05$  adipocyte CM + AEDC vs. adipocyte CM + DMSO; & $P < 0.05$  adipocyte CM + AEDC vs. adipocyte CM + AEDC + 3-TYP.

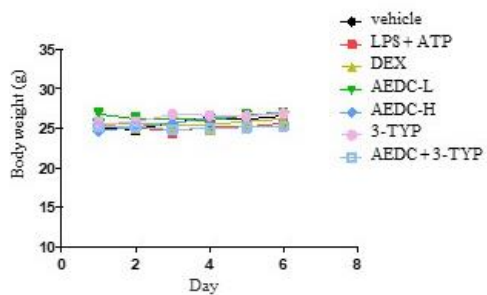

**Figure S4.** The body weight of different group of LPS plus ATP-induced mice model. DEX: 4 mg·Kg<sup>-1</sup> dexamethasone; AEDC-L: 5 mg·Kg<sup>-1</sup> AEDC; AEDC-H: 20 mg·Kg<sup>-1</sup> AEDC; 3-TYP: 4 mg·Kg<sup>-1</sup> 3-TYP; AEDC + 3-TYP: 20 mg·Kg<sup>-1</sup> AEDC and 4 mg·Kg<sup>-1</sup> 3-TYP.
